# Supplementary material
Source: PubMed Central journal article supplement (PMC2804193)
Supplement: supp_M109.048850_jbc.M109.048850-1.pdf [file supp_M109.048850_jbc.M109.048850-1.pdf]

**Supplementary Fig. 1**

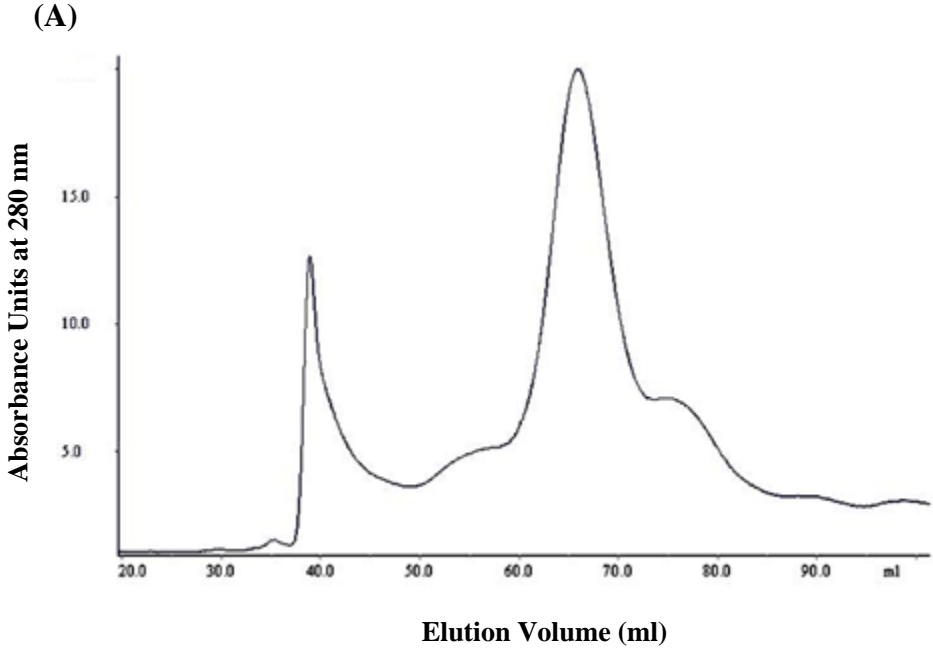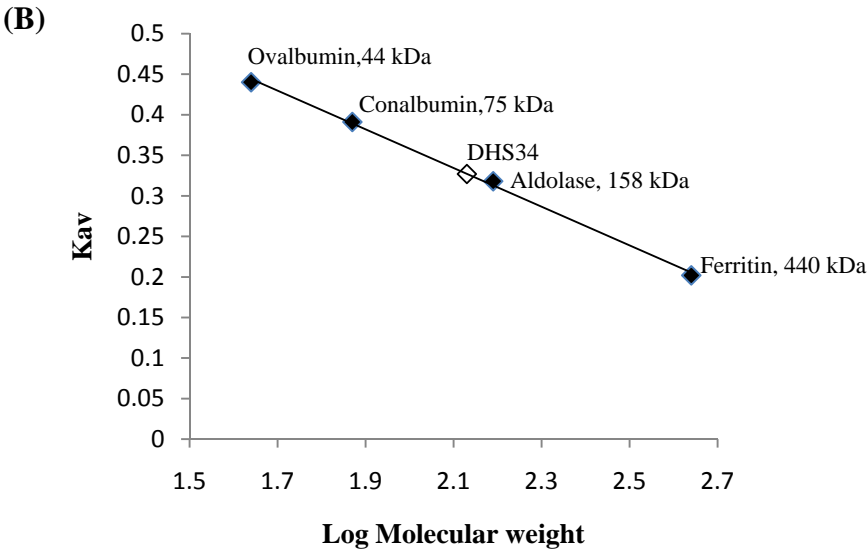

## Supplementary Figure Legend

**Supplementary Fig. 1. (A) Size Exclusion chromatography of recombinant deoxyhypusine synthase 34 from *L. donovani* on sephacryl S-300 column.** Purified protein obtained after Ni-NTA affinity chromatography was concentrated and applied to sephacryl S-300 (1.6 cm x 60 cm) equilibrated with buffer containing 50 mM sodium phosphate buffer pH 7.5, 300 mM NaCl and 15% glycerol.

**(B) Determination of the molecular weight of the native deoxyhypusine synthase 34.** Purified protein obtained after Ni-NTA affinity chromatography was concentrated and applied to sephacryl S-300 (1.6 cm x 60 cm) equilibrated with buffer containing 50 mM sodium phosphate buffer pH 7.5, 300 mM NaCl and 15% glycerol. The sephacryl S-300 column was calibrated with Ferritin (440 kDa), Aldolase (158 kDa), Conalbumin (75 kDa) and Ovalbumin (44 kDa) (all from Amersham Biosciences) and their elution positions are indicated. The apparent molecular mass of DHS34 native enzyme was determined as ~135kDa. The constant  $K_{av}$  is defined as,  $K_{av} = (V_e - V_0) / (V_t - V_0)$ , where,  $V_e$  is the elution volume of the protein,  $V_0$  is the void volume of the column as determined by blue dextran,  $V_t$  is the total volume of the column.
